# Supplementary material for: Defining venous thromboembolism and measuring its incidence using Swedish health registries: a nationwide pregnancy cohort study
Source: HighWire-hosted journal article supplement (doi:10.1136/bmjopen-2015-008864), 2015-11-01
Supplement: bmjopen-2015-008864supp_tables.pdf [file bmjopen-2015-008864supp_tables.pdf]

**Supplementary table 1:ICD-10 codelist for VTE**

|      |                                                                           |
|------|---------------------------------------------------------------------------|
| I260 | Pulmonary embolism with mention of acute cor pulmonale                    |
| I269 | Pulmonary embolism without mention of acute cor pulmonale                 |
| I801 | Phlebitis and thrombophlebitis of femoral vein                            |
| I802 | Phlebitis and thrombophlebitis of other deep vessels of lower extremities |
| I803 | Phlebitis and thrombophlebitis of lower extremities, unspecified          |
| I808 | Phlebitis and thrombophlebitis of other sites                             |
| I809 | Phlebitis and thrombophlebitis of unspecified site                        |
| I820 | Budd-Chiari syndrome                                                      |
| I821 | Thrombophlebitis migrans                                                  |
| I822 | Embolism and thrombosis of vena cava                                      |
| I823 | Embolism and thrombosis of renal vein                                     |
| I828 | Embolism and thrombosis of other specified veins                          |
| I829 | Embolism and thrombosis of unspecified vein                               |
| O082 | Embolism following abortion and ectopic and molar pregnancy               |
| O223 | Deep phlebothrombosis in pregnancy                                        |
| O871 | Deep phlebothrombosis in the puerperium                                   |
| O882 | Obstetric blood-clot embolism                                             |
| I81  | Portal vein thrombosis                                                    |

**Supplementary table 2: Anticoagulants ATC codes**

| <b>ATC codes</b> | <b>Description</b>            |
|------------------|-------------------------------|
| B01AA03          | Warfarin                      |
| B01AA04          | Fenpropakumon                 |
| B01AA07          | Acenokumarol                  |
| B01AB01          | Heparin                       |
| B01AB02          | Antitrombin III               |
| B01AB04          | Dalteparin                    |
| B01AB05          | Enoxaparin                    |
| B01AB09          | Danaparoid                    |
| B01AB10          | Tinzaparin                    |
| B01AC            | Platlet aggregation inhibitor |
| B01AC04          | Clopidogrel                   |
| B01AC05          | Ticlopidine                   |
| B01AC06          | Aspirin                       |
| B01AC07          | Dipyridamole                  |
| B01AC09          | Epoprostenol                  |
| B01AC11          | Iloprost                      |
| B01AC21          | Treprostinil                  |
| B01AC22          | Prasugrel                     |
| B01AC24          | Tikagrelor                    |
| B01AC30          | Antiplatelet agents           |
| B01AD01          | Streptokinase                 |
| B01AD02          | Alteplase                     |
| B01AD10          | Drotrekogin                   |
| B01AE05          | Ximelagatran                  |
| B01AE07          | Dabigatran                    |
| B01AF01          | Rivaroxaban                   |
| B01AX05          | Fondaparinux                  |

Supplementary table 3: Confirmation of cases based on VTE type and position of diagnosis

| Parameters                                                                                                            | Anticoagulant prescriptions confirmed diagnosis by source of diagnosis |                        |
|-----------------------------------------------------------------------------------------------------------------------|------------------------------------------------------------------------|------------------------|
|                                                                                                                       | Inpatient Numbers (%)                                                  | Outpatient Numbers (%) |
| <b>VTE diagnostic code</b>                                                                                            |                                                                        |                        |
| Pulmonary embolism<br>(ICD 10: 0882, I269, I260)<br>(ICD 9: 415, 673)                                                 | 470 (94.4)                                                             | 93 (52.0)              |
| Deep vein thrombosis<br>(ICD 10: I801, I828, I829, O223, I822, I820, I802, I81, O082, I823, O871)<br>(ICD 9:452, 453) | 467 (94.0)                                                             | 622 (66.7)             |
| Thrombophlebitis<br>(ICD 10: I809, I821, I808, I803)<br>(ICD 9: 451, 671)                                             | 41 (51.2)                                                              | 307 (45.4)             |
|                                                                                                                       |                                                                        |                        |
| <b>Position of diagnosis</b>                                                                                          |                                                                        |                        |
| Main diagnosis                                                                                                        | 738 (94.9)                                                             | 93 (52.0)              |
| First secondary diagnosis                                                                                             | 123 (88.5)                                                             | 622 (66.7)             |
| Second diagnosis                                                                                                      | 117 (74.1)                                                             | 307 (45.4)             |
